# Supplementary material for: A Glycoside Hydrolase Family 62 A-L-Arabinofuranosidase from Trichoderma Reesei and Its Applicable Potential during Mashing
Source: PubMed Central journal article supplement (PMC7143738; doi:10.3390/foods9030356), 2020-03-19
Supplement: foods-09-00356-s001.pdf [file foods-09-00356-s001.pdf]

## Supplementary materials

**Table S1.** Information of the protein band with AFase activity.

| Item                                                 | Result                          |
|------------------------------------------------------|---------------------------------|
| Protein name                                         | $\alpha$ -L-arabinofuranosidase |
| Accession number                                     | gi 589103163                    |
| CAZy family                                          | GH 62                           |
| Mascot score                                         | 326                             |
| Predicted molar mass/ isoelectric point <sup>1</sup> | 34.9/6.4                        |

<sup>1</sup> The predicted molar mass and isoelectric point were acquired from ProtParam tool (<https://web.expasy.org/protparam/>).

**Table S2.** Purification summary of TrAbf62.

| Purification Step                                             | Total Protein (mg) | Total Activity (mU) <sup>1</sup> | Specific Activity (mU/mg) | Purification Fold | Yield (%) |
|---------------------------------------------------------------|--------------------|----------------------------------|---------------------------|-------------------|-----------|
| Culture filtrate                                              | 280                | 20720                            | 74                        | 1                 | 100       |
| (NH <sub>4</sub> ) <sub>2</sub> SO <sub>4</sub> fractionation | 123                | 15483                            | 126                       | 1.7               | 74.7      |
| Sephadex G-25                                                 | 108                | 12308                            | 133                       | 1.8               | 59.4      |
| DEAE-Sepharose Fast Flow                                      | 13.5               | 7092                             | 525                       | 7.1               | 34.2      |
| Sephacryl S-100                                               | 6.6                | 5492                             | 832                       | 11.2              | 26.5      |

<sup>1</sup> The activity was assayed at pH 5.5.

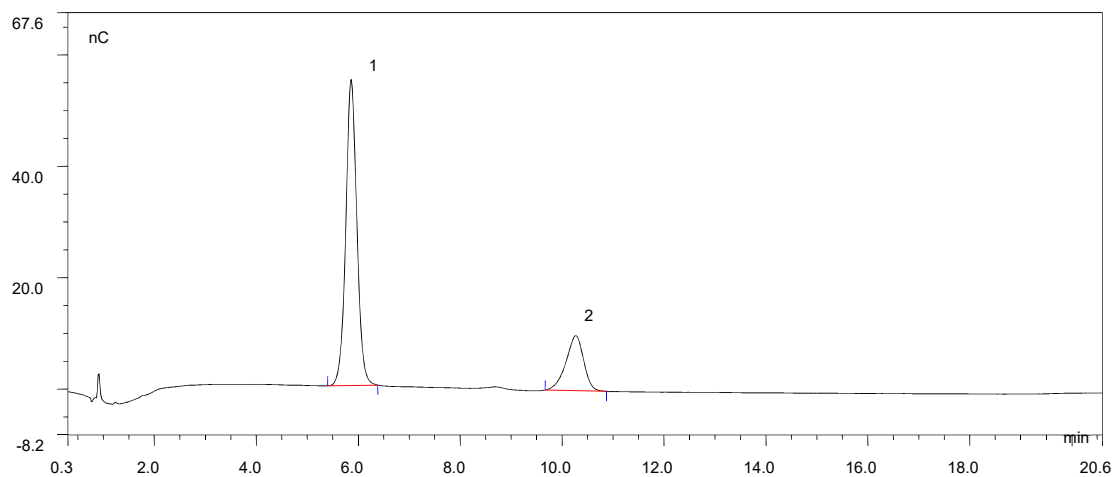

(a) soluble wheat arabinoxylan

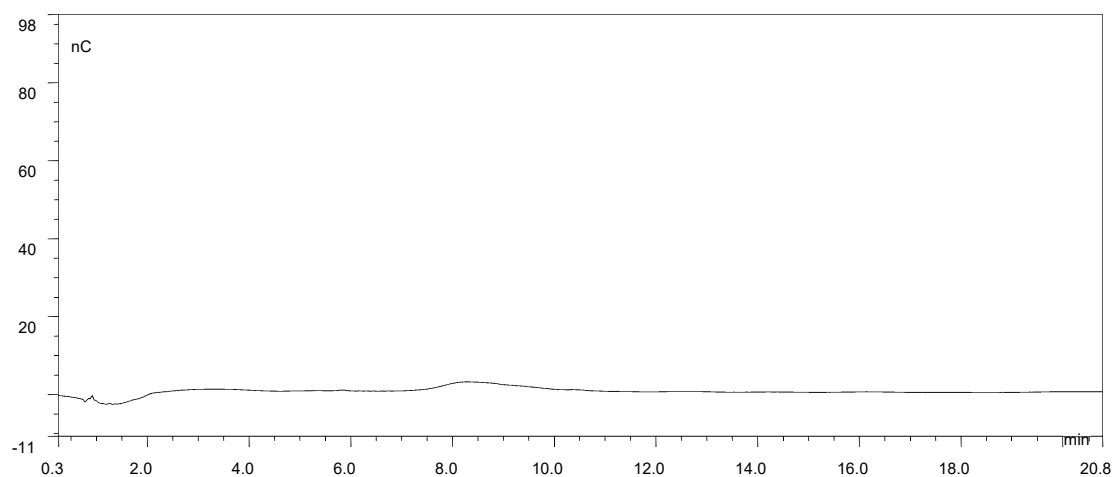

(b) insoluble wheat arabinoxylan

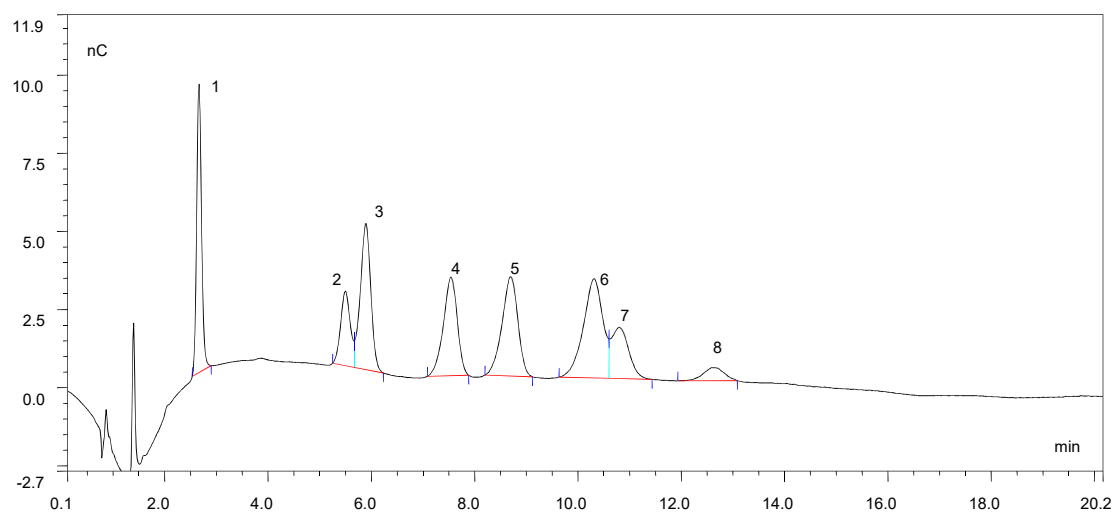

(c) standard sugars

| No. | Sugar Name | Retention Time (min) | Concentration (mg/L) |
|-----|------------|----------------------|----------------------|
| 1   | fucose     | 2.667                | 5                    |
| 2   | rhamnose   | 5.5                  | 5                    |
| 3   | arabinose  | 5.9                  | 5                    |
| 4   | galactose  | 7.55                 | 5                    |
| 5   | glucose    | 8.7                  | 5                    |
| 6   | xylose     | 10.317               | 5                    |
| 7   | mannose    | 10.8                 | 5                    |
| 8   | fructose   | 12.617               | 5                    |

**Figure S1** Chromatography profiles of standards (c) and the hydrolysates by TrAbf62A from soluble (a) and insoluble (b) wheat arabinoxylans.
